# Supplementary material for: Outcomes and latency to delivery in preterm prelabour rupture of membranes at 22–28 weeks: a retrospective cohort study
Source: Research Square preprint supplement (doi:10.21203/rs.3.rs-8242616/v1), 2025-12-16
Supplement: Supplementary file 1 [file 745cbccf3f1e22811bef63b4.docx]

| **Additional file 1:** Relationship of Latency Interval With Maternal and Neonatal Outcomes | | | | |
| --- | --- | --- | --- | --- |
|  |  | n | Latency (days),Median(IQR) | p |
| **Maternal Outcome** |  |  |  |  |
| Clinical chorioamnionitis | Yes | 46 | 6 (2-16,2) | 0,395 |
|  | No | 121 | 7 (3-26) |  |
| Retained placenta | Yes | 18 | 2 (1-9,5) | **0,007** |
|  | No | 149 | 7 (3-26) |  |
| Sepsis | Yes | 7 | 4 (2-10) | 0,507 |
|  | No | 160 | 6,5 (2-23,7) |  |
| Postpartum hemorrhage | Yes | 11 | 8 (5-17) | 0,413 |
|  | No | 156 | 6 (2-23,7) |  |
| Wound infection | Yes | 7 | 8 (0-27) | 0,686 |
|  | No | 160 | 6 (2-22,7) |  |
| Placental abruption | Yes | 18 | 4 (1,7-15) | 0,253 |
|  | No | 149 | 7 (2-24,5) |  |
| Non-cephalic presentation | Yes | 19 | 4 (1-9) | **0,023** |
|  | No | 148 | 7 (3-26,5) |  |
| Cord prolapse | Yes | 5 | 8 (1,5-21,5) | 0,799 |
|  | No | 162 | 6 (2-23,2) |  |
| Intrauterine fetal demise | Yes | 10 | 4 (0,7-8) | 0,088 |
|  | No | 157 | 7 (2-25) |  |
| **Neonatal outcome** |  |  |  |  |
| Sepsis | Yes | 33 | 9(3,5-31) | 0,065 |
|  | No | 29 | 28(4,5-49) |  |
| Intraventricular hemorrhage | Yes | 14 | 7(2-35,5) | 0,254 |
|  | No | 47 | 17(4-45,5) |  |
| Respiratory distress syndrome | Yes | 45 | 9(3,5-31) | **0,005** |
|  | No | 16 | 46(17,2-59,2) |  |
| Retinopathy of Prematurity | Yes | 23 | 10(4-34) | 0,47 |
|  | No | 38 | 17(4,47,5) |  |
| Bronchopulmonary dysplasia | Yes | 21 | 4(3-22,5) | **0,025** |
|  | No | 40 | 24,5(5-50,5) |  |
| Necrotizing enterocolitis | Yes | 6 | 4(1,5-55,2) | 0,485 |
|  | No | 55 | 16(4-42) |  |
| Hearing Loss | Yes | 8 | 14(4-28,7) | 0,806 |
|  | No | 53 | 15(4-46) |  |
| Neurodevelopmental impairment | Yes | 15 | 9(3-34) | 0,287 |
|  | No | 46 | 17,5(4-45,5) |  |
